# Supplementary material
Source: MDPI journal article supplement (https://www.mdpi.com/2073-445X/3/1/74)
Supplement: s1 [file s1]

*Land* **2014**, *3*, 74-104manuscripts; doi:10.3390/land3010074

**OPEN ACCESS**

***land***

**ISSN 2073-445X**

www.mdpi.com/journal/land/

*Supplementary* *Information*

Analyzing Vegetation Change in an Elephant-Impacted Landscape Using the Moving Standard Deviation Index. *Land* 2014, *3*, 74-104

Timothy J. Fullman * and Erin Bunting

Department of Geography, University of Florida, 3141 Turlington Hall P.O. Box 117315, Gainesville, FL 32611, USA

***** Author to whom correspondence should be addressed; E-Mail: tfullman@ufl.edu;
Tel.: +1-352-294-7527; Fax: +1-352-392-8855.

**Figure S1.** Near infrared (NIR) band MODIS data used to assess elephant utilization of vegetation along the Chobe riverfront, Chobe National Park, Botswana. The top row shows the base reflectance images for the three dates assessed in this project. Subsequent rows show the Moving Standard Deviation Index (MSDI) values calculated using 3 × 3-, 5 × 5-, and 7 × 7-pixel moving windows, respectively.

**
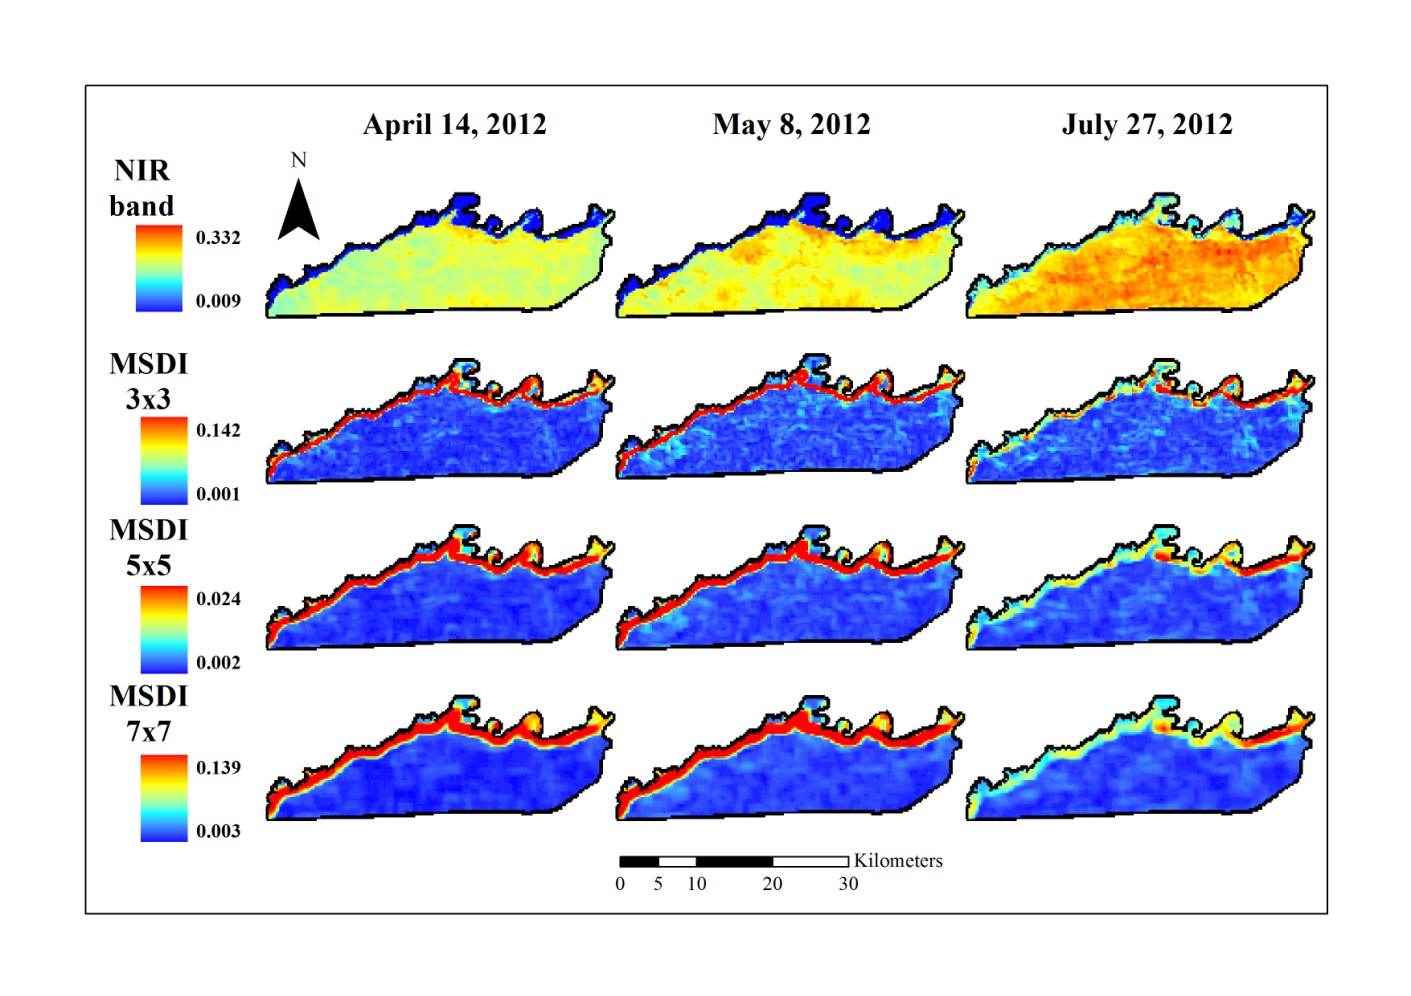
**

**Figure S2.** Soil-adjusted vegetation index (SAVI) data used to assess elephant utilization of vegetation along the Chobe riverfront, Chobe National Park, Botswana. The top row shows the base images for the three dates assessed in this project. Subsequent rows show the Moving Standard Deviation Index (MSDI) values calculated using 3 × 3-, 5 × 5-, and 7 × 7-pixel moving windows, respectively. These indices are unitless. SAVI ranges from −1 to +1 while the MSDI has a minimum value of zero and a maximum determined by the data.


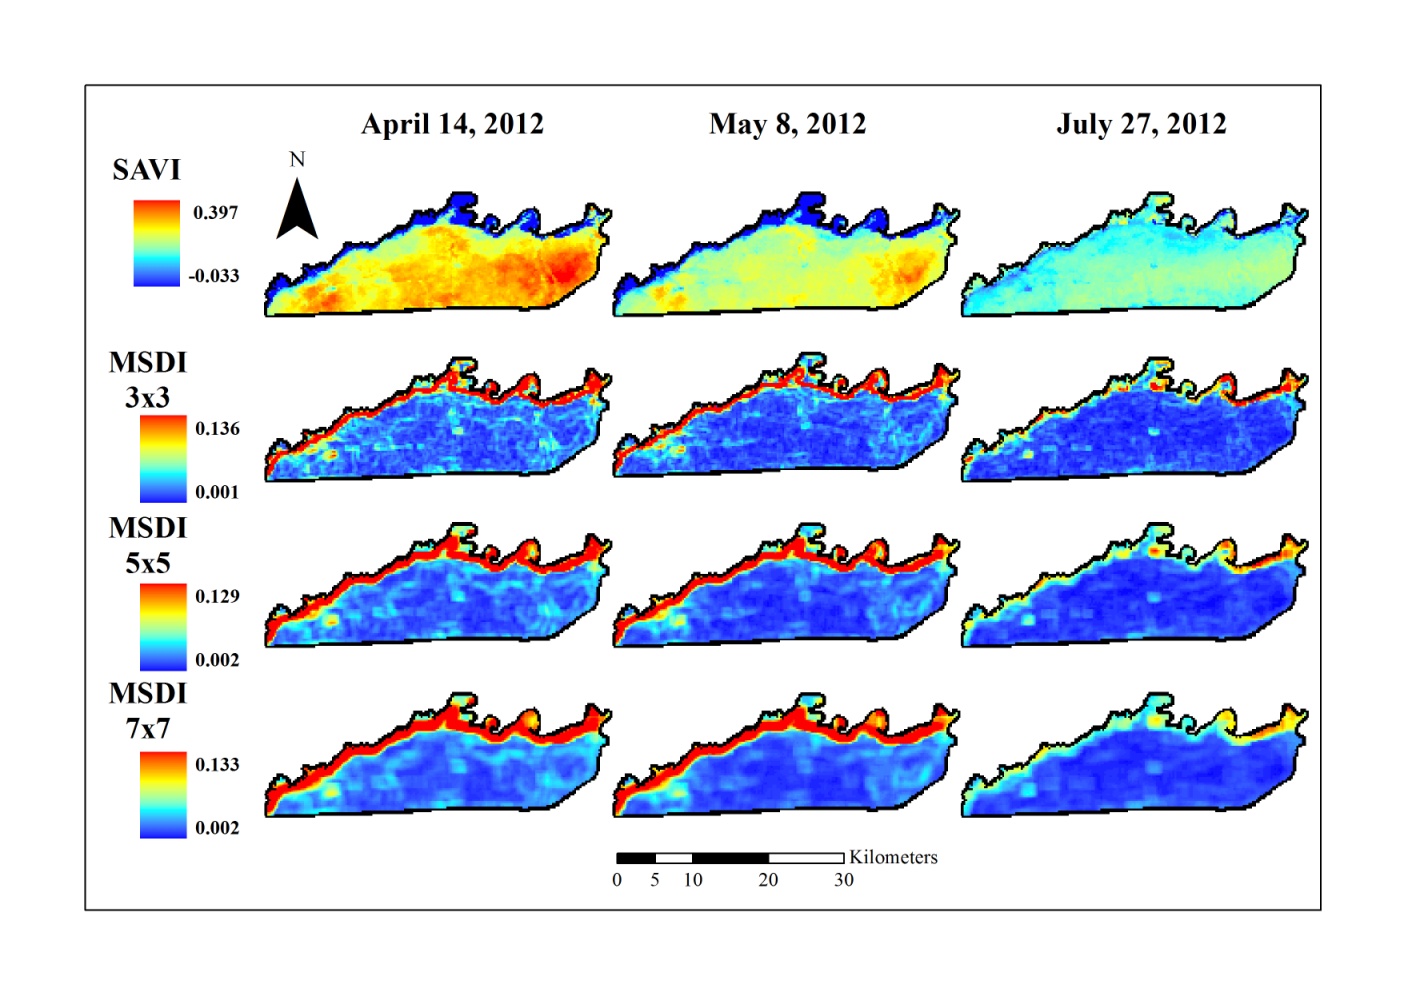


**Figure S3.** Modified soil-adjusted vegetation index (MSAVI2) data used to assess elephant utilization of vegetation along the Chobe riverfront, Chobe National Park, Botswana. The top row shows the base images for the three dates assessed in this project. Subsequent rows show the Moving Standard Deviation Index (MSDI) values calculated using 3 × 3-, 5 × 5-, and 7 × 7-pixel moving windows, respectively. These indices are unitless. MSAVI2 ranges from −1 to +1 while the MSDI has a minimum value of zero and a maximum determined by the data.


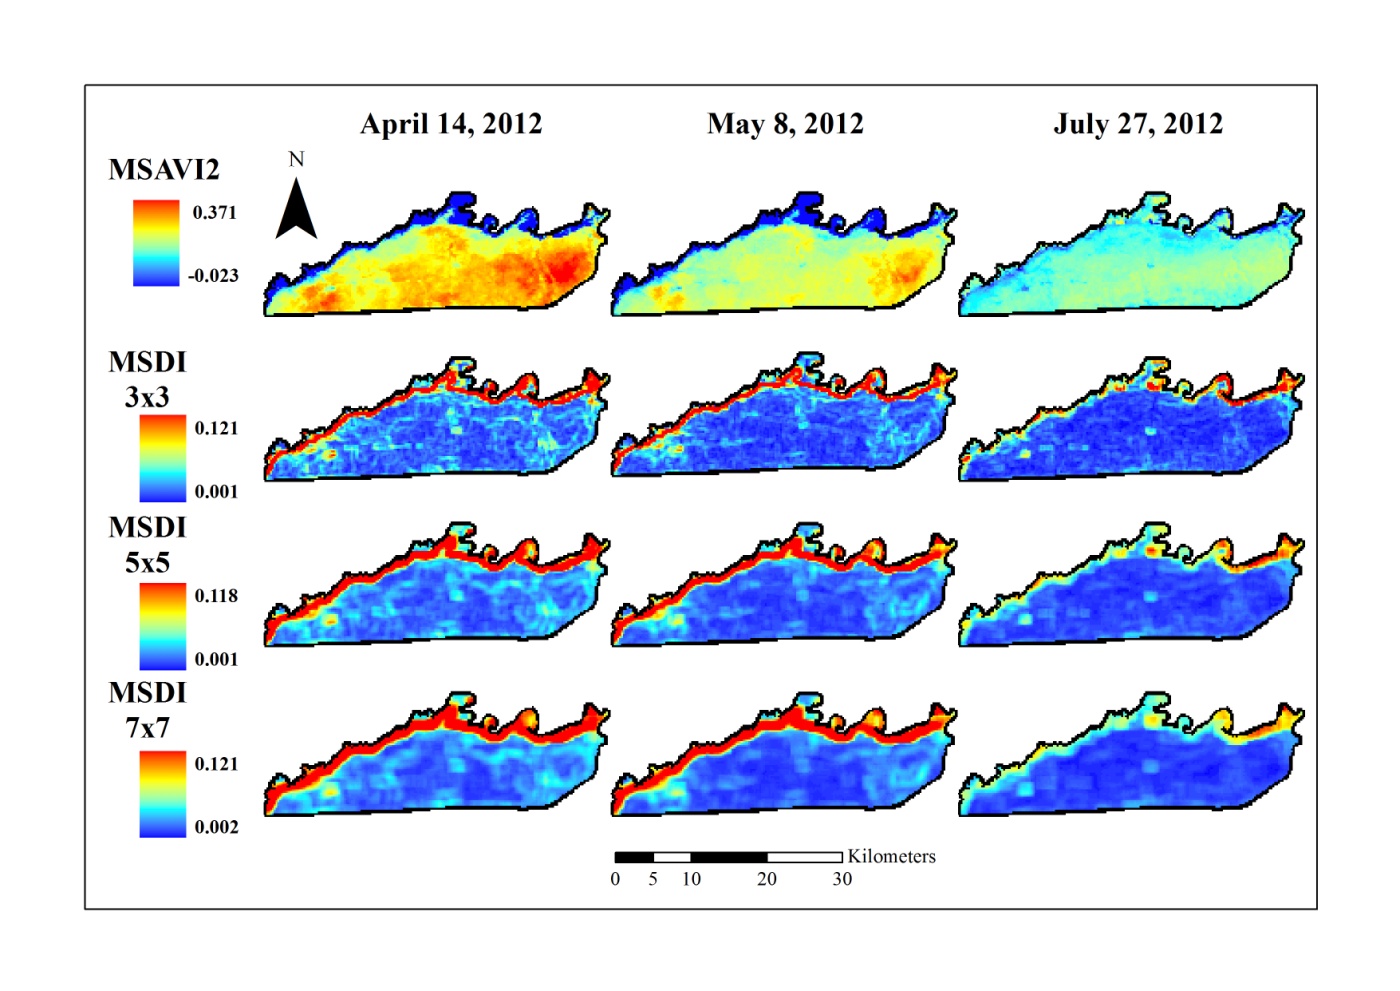


**Figure S4.** Percent elephant utilization interpolated across the Chobe riverfront using universal kriging with the Moving Standard Deviation Index (MSDI) as the explanatory variable. The white, grey, and black sections indicate the three window sizes used for MSDI calculation while rows within sections indicate the imagery dates.


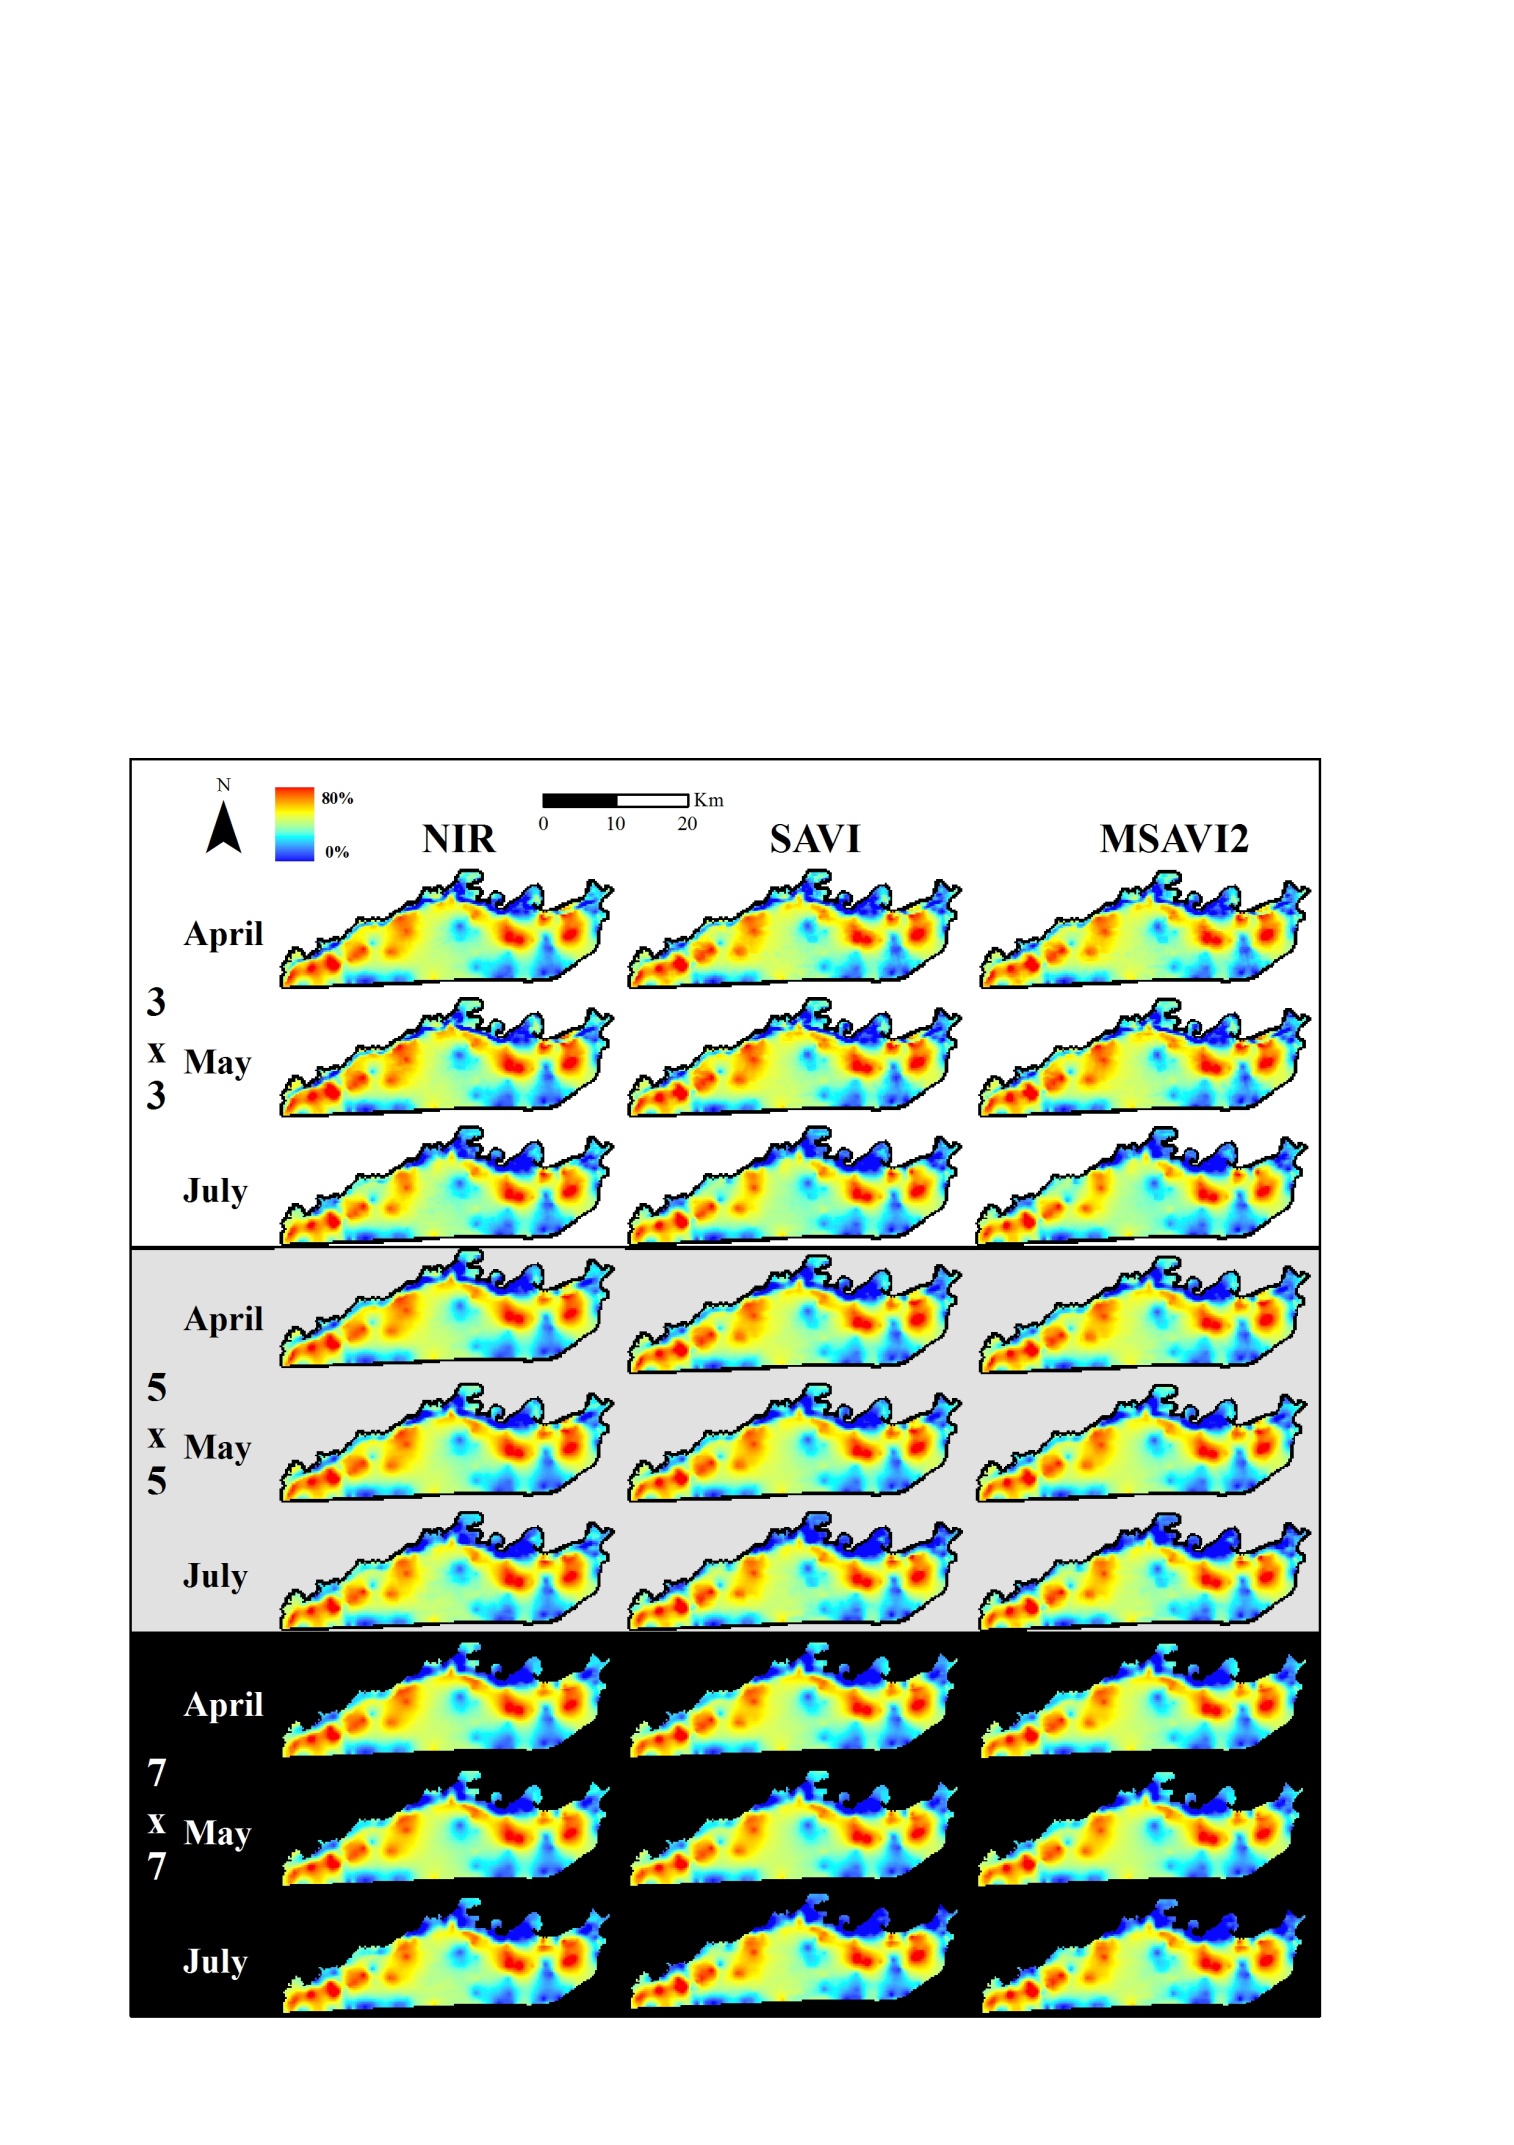


**Table S1.** Spatial regression results for weighted elephant utilization in the riverfront subset of Chobe National Park, Botswana. Values in parentheses indicate standard error estimates for regression parameters (n = 90 for all models). The intercept and lambda terms are significant (*p* < 0.05) for all models. All dates are in 2012.

| **Image** | **Window** | **Date** | **Intercept** | | **MSDI** | |  | **Lambda** | | **RMSE** | **R2** | **ΔAIC** |
| --- | --- | --- | --- | --- | --- | --- | --- | --- | --- | --- | --- | --- |
| Red | 3 × 3 | 14/4 | 53.21 | (6.37) | -865.37 | (180.44) | ** | 0.50 | (0.16) | 21.32 | 0.27 | 5.48 |
| 8/5 | 50.59 | (6.24) | -577.42 | (129.42) | ** | 0.50 | (0.16) | 21.62 | 0.25 | 5.38 |
| 27/7 | 40.36 | (6.40) | -423.16 | (216.73) | ᵻ | 0.46 | (0.17) | 23.45 | 0.12 | 3.61 |
| 5 × 5 | 14/4 | 62.56 | (7.58) | -1038.63 | (204.80) | ** | 0.51 | (0.16) | 21.06 | 0.29 | 6.22 |
| 8/5 | 53.09 | (7.76) | -532.49 | (156.90) | ** | 0.48 | (0.16) | 22.53 | 0.19 | 4.37 |
| 27/7 | 50.54 | (7.62) | -699.13 | (225.27) | ** | 0.48 | (0.16) | 22.73 | 0.18 | 4.18 |
| 7 × 7 | 14/4 | 67.89 | (9.48) | -1133.02 | (259.83) | ** | 0.50 | (0.16) | 21.71 | 0.25 | 5.72 |
| 8/5 | 53.35 | (9.96) | -492.89 | (202.41) | * | 0.46 | (0.17) | 23.20 | 0.14 | 3.49 |
| 27/7 | 51.21 | (9.34) | -647.94 | (266.35) | * | 0.49 | (0.16) | 23.15 | 0.14 | 4.58 |
| NIR | 3 × 3 | 14/4 | 46.88 | (5.87) | -274.53 | (67.60) | ** | 0.49 | (0.16) | 21.98 | 0.23 | 4.56 |
| 8/5 | 47.11 | (6.04) | -240.84 | (60.00) | ** | 0.50 | (0.16) | 22.00 | 0.23 | 5.16 |
| 27/7 | 36.08 | (6.30) | -139.62 | (131.12) |  | 0.48 | (0.16) | 23.78 | 0.10 | 4.05 |
| 5 × 5 | 14/4 | 51.01 | (7.18) | -278.49 | (78.80) | ** | 0.49 | (0.16) | 22.40 | 0.20 | 4.81 |
| 8/5 | 47.13 | (7.56) | -189.93 | (72.23) | ** | 0.49 | (0.16) | 23.04 | 0.15 | 4.58 |
| 27/7 | 44.01 | (7.46) | -308.51 | (138.02) | * | 0.52 | (0.15) | 23.24 | 0.14 | 5.41 |
| 7 × 7 | 14/4 | 53.73 | (9.20) | -283.89 | (101.17) | ** | 0.50 | (0.16) | 22.91 | 0.16 | 4.82 |
| 8/5 | 46.31 | (9.86) | -160.41 | (94.95) | ᵻ | 0.48 | (0.16) | 23.55 | 0.12 | 4.06 |
| 27/7 | 43.70 | (8.82) | -273.32 | (162.63) | ᵻ | 0.53 | (0.15) | 23.50 | 0.12 | 5.53 |
| NDVI | 3 × 3 | 14/4 | 45.04 | (6.36) | -191.05 | (60.78) | ** | 0.50 | (0.16) | 22.69 | 0.18 | 5.04 |
| 8/5 | 43.13 | (5.81) | -153.00 | (45.21) | ** | 0.50 | (0.16) | 22.51 | 0.19 | 4.89 |
| 27/7 | 40.35 | (5.95) | -300.66 | (128.07) | * | 0.48 | (0.16) | 23.22 | 0.14 | 4.52 |
| 5 × 5 | 14/4 | 51.86 | (8.58) | -213.48 | (68.95) | ** | 0.58 | (0.14) | 22.63 | 0.18 | 8.29 |
| 8/5 | 45.91 | (7.12) | -137.88 | (54.72) | * | 0.44 | (0.17) | 23.18 | 0.14 | 2.66 |
| 27/7 | 47.62 | (7.14) | -376.72 | (120.17) | ** | 0.53 | (0.15) | 22.66 | 0.18 | 6.92 |
| 7 × 7 | 14/4 | 52.30 | (10.88) | -191.11 | (86.72) | * | 0.57 | (0.14) | 23.20 | 0.14 | 6.97 |
| 8/5 | 51.12 | (9.16) | -159.67 | (65.85) | * | 0.45 | (0.17) | 23.22 | 0.14 | 3.19 |
| 27/7 | 49.73 | (7.86) | -374.11 | (126.58) | ** | 0.52 | (0.15) | 22.79 | 0.17 | 6.45 |
| SAVI | 3 × 3 | 14/4 | 45.98 | (6.32) | -255.18 | (77.36) | ** | 0.48 | (0.16) | 22.59 | 0.19 | 4.24 |
| 8/5 | 45.25 | (6.20) | -251.20 | (75.86) | ** | 0.49 | (0.16) | 22.57 | 0.19 | 4.49 |
| 27/7 | 34.19 | (6.10) | -129.91 | (195.85) |  | 0.48 | (0.16) | 23.86 | 0.09 | 4.22 |
| 5 × 5 | 14/4 | 47.64 | (8.12) | -222.21 | (90.82) | * | 0.50 | (0.16) | 23.14 | 0.15 | 4.96 |
| 8/5 | 43.59 | (8.05) | -169.59 | (92.16) | ᵻ | 0.49 | (0.16) | 23.47 | 0.12 | 4.36 |
| 27/7 | 41.58 | (7.31) | -385.71 | (197.20) | ᵻ | 0.54 | (0.15) | 23.36 | 0.13 | 6.36 |
| 7 × 7 | 14/4 | 47.73 | (10.97) | -195.65 | (119.46) |  | 0.50 | (0.16) | 23.54 | 0.12 | 4.94 |
| 8/5 | 40.84 | (10.86) | -113.77 | (121.17) |  | 0.48 | (0.16) | 23.80 | 0.10 | 4.20 |
| 27/7 | 43.14 | (8.39) | -403.38 | (225.95) | ᵻ | 0.55 | (0.15) | 23.42 | 0.12 | 6.43 |

**Table S1.** *Cont.*

| **Image** | **Window** | **Date** | **Intercept** | | **MSDI** | |  | **Lambda** | | **RMSE** | **R2** | **ΔAIC** |
| --- | --- | --- | --- | --- | --- | --- | --- | --- | --- | --- | --- | --- |
| MSAVI2 | 3 × 3 | 14/4 | 45.47 | (6.36) | -262.19 | (84.00) | ** | 0.48 | (0.16) | 22.73 | 0.18 | 4.02 |
| 8/5 | 45.23 | (6.28) | -271.12 | (84.20) | ** | 0.49 | (0.16) | 22.64 | 0.18 | 4.43 |
| 27/7 | 33.84 | (6.14) | -112.56 | (201.75) |  | 0.48 | (0.16) | 23.88 | 0.09 | 4.17 |
| 5 × 5 | 14/4 | 47.04 | (8.19) | -228.91 | (99.22) | * | 0.49 | (0.16) | 23.23 | 0.14 | 4.60 |
| 8/5 | 42.88 | (8.19) | -172.81 | (102.45) | ᵻ | 0.49 | (0.16) | 23.54 | 0.12 | 4.36 |
| 27/7 | 41.22 | (7.38) | -383.03 | (208.23) | ᵻ | 0.53 | (0.15) | 23.42 | 0.13 | 6.14 |
| 7 × 7 | 14/4 | 45.85 | (11.15) | -185.42 | (131.35) |  | 0.49 | (0.16) | 23.64 | 0.11 | 4.60 |
| 8/5 | 39.31 | (11.01) | -103.06 | (134.26) |  | 0.48 | (0.16) | 23.84 | 0.09 | 4.15 |
| 27/7 | 43.08 | (8.53) | -414.94 | (239.78) | ᵻ | 0.55 | (0.15) | 23.45 | 0.12 | 6.35 |

**Note:** ** = *p* < 0.01, * = *p* < 0.05, ᵻ = *p* < 0.1, NIR = Near Infrared; NDVI = Normalized Difference Vegetation Index; SAVI = Soil-Adjusted Vegetation Index; MSAVI2 = Modified Soil-Adjusted Vegetation Index; RMSE = Root mean square error; ΔAIC indicates the difference in the Akaike Information Criterion between the spatial and non-spatial forms of the regression model (AICnon-spatial - AICspatial), thus positive ΔAIC indicates model improvement over the non-spatial form.

**Table S2.** Spatial regression results for weighted elephant utilization in the inland subset of Chobe National Park, Botswana. Values in parentheses indicate standard error estimates for regression parameters (n = 167 for all models). The intercept and lambda terms are highly significant (*p* < 0.005) for all models. All dates are in 2012.

| **Image** | **Window** | **Date** | **Intercept** | | **MSDI** | |  | **Lambda** | | **RMSE** | **R2** | **ΔAIC** |
| --- | --- | --- | --- | --- | --- | --- | --- | --- | --- | --- | --- | --- |
| Red | 3 × 3 | 14/4 | 38.61 | (4.60) | 1040.46 | (440.96) | * | 0.62 | (0.11) | 18.66 | 0.20 | 19.34 |
| 8/5 | 38.36 | (4.51) | 969.02 | (388.84) | * | 0.61 | (0.11) | 18.64 | 0.21 | 18.62 |
| 27/7 | 37.37 | (4.87) | 1489.42 | (620.67) | * | 0.62 | (0.11) | 18.65 | 0.21 | 19.61 |
| 5 × 5 | 14/4 | 38.57 | (4.93) | 777.82 | (399.52) | ᵻ | 0.61 | (0.11) | 18.77 | 0.20 | 18.66 |
| 8/5 | 37.62 | (4.79) | 782.15 | (333.59) | * | 0.60 | (0.11) | 18.69 | 0.20 | 18.66 |
| 27/7 | 36.64 | (5.23) | 1262.59 | (575.72) | * | 0.60 | (0.11) | 18.73 | 0.20 | 17.02 |
| 7 × 7 | 14/4 | 38.52 | (4.99) | 684.85 | (365.86) | ᵻ | 0.60 | (0.11) | 18.80 | 0.19 | 17.19 |
| 8/5 | 36.77 | (4.70) | 754.79 | (291.59) | ** | 0.58 | (0.11) | 18.66 | 0.20 | 16.20 |
| 27/7 | 40.99 | (5.18) | 508.66 | (469.18) |  | 0.61 | (0.11) | 18.91 | 0.18 | 15.87 |
| NIR | 3 × 3 | 14/4 | 44.77 | (5.10) | -32.32 | (551.75) |  | 0.65 | (0.10) | 18.91 | 0.18 | 23.46 |
| 8/5 | 41.23 | (4.80) | 485.86 | (387.34) |  | 0.62 | (0.11) | 18.87 | 0.19 | 19.79 |
| 27/7 | 45.66 | (5.03) | -134.15 | (351.07) |  | 0.65 | (0.10) | 18.90 | 0.18 | 24.45 |
| 5 × 5 | 14/4 | 45.43 | (4.70) | -119.05 | (266.12) |  | 0.66 | (0.10) | 18.89 | 0.18 | 24.12 |
| 8/5 | 42.83 | (4.70) | 195.94 | (260.75) |  | 0.63 | (0.10) | 18.91 | 0.18 | 20.00 |
| 27/7 | 45.65 | (5.21) | -110.57 | (316.09) |  | 0.65 | (0.10) | 18.90 | 0.18 | 24.54 |
| 7 × 7 | 14/4 | 45.26 | (4.58) | -75.74 | (167.33) |  | 0.66 | (0.10) | 18.89 | 0.18 | 23.43 |
| 8/5 | 43.77 | (4.44) | 73.53 | (150.31) |  | 0.64 | (0.10) | 18.92 | 0.18 | 19.44 |
| 27/7 | 46.65 | (5.17) | -194.12 | (257.07) |  | 0.66 | (0.10) | 18.86 | 0.19 | 24.83 |

**Table S2.** *Cont.*

| **Image** | **Window** | **Date** | **Intercept** | | **MSDI** | |  | **Lambda** | | **RMSE** | **R2** | **ΔAIC** |
| --- | --- | --- | --- | --- | --- | --- | --- | --- | --- | --- | --- | --- |
| NDVI | 3 × 3 | 14/4 | 40.35 | (5.06) | 171.87 | (119.82) |  | 0.64 | (0.10) | 18.81 | 0.19 | 23.49 |
| 8/5 | 41.83 | (4.93) | 143.73 | (141.62) |  | 0.64 | (0.10) | 18.87 | 0.19 | 23.11 |
| 27/7 | 41.22 | (5.10) | 343.92 | (292.94) |  | 0.66 | (0.10) | 18.83 | 0.19 | 25.17 |
| 5 × 5 | 14/4 | 40.81 | (5.16) | 116.87 | (98.36) |  | 0.63 | (0.10) | 18.86 | 0.19 | 21.78 |
| 8/5 | 41.09 | (4.95) | 134.68 | (109.68) |  | 0.63 | (0.10) | 18.86 | 0.19 | 22.15 |
| 27/7 | 40.62 | (5.37) | 323.01 | (273.72) |  | 0.65 | (0.10) | 18.83 | 0.19 | 24.53 |
| 7 × 7 | 14/4 | 41.17 | (5.03) | 91.67 | (80.80) |  | 0.63 | (0.11) | 18.88 | 0.19 | 20.56 |
| 8/5 | 40.98 | (4.77) | 118.67 | (86.82) |  | 0.63 | (0.11) | 18.85 | 0.19 | 20.86 |
| 27/7 | 40.59 | (5.35) | 290.64 | (247.90) |  | 0.64 | (0.10) | 18.85 | 0.19 | 23.23 |
| SAVI | 3 × 3 | 14/4 | 43.71 | (5.11) | 73.76 | (244.67) |  | 0.65 | (0.10) | 18.91 | 0.18 | 24.47 |
| 8/5 | 44.32 | (4.90) | 28.22 | (257.72) |  | 0.65 | (0.10) | 18.91 | 0.18 | 24.28 |
| 27/7 | 45.66 | (4.85) | -146.96 | (356.39) |  | 0.65 | (0.10) | 18.91 | 0.18 | 23.79 |
| 5 × 5 | 14/4 | 44.32 | (5.01) | 18.07 | (173.80) |  | 0.65 | (0.10) | 18.92 | 0.18 | 23.76 |
| 8/5 | 43.85 | (4.84) | 59.16 | (190.68) |  | 0.65 | (0.10) | 18.91 | 0.18 | 23.54 |
| 27/7 | 46.21 | (5.08) | -186.98 | (338.47) |  | 0.65 | (0.10) | 18.90 | 0.18 | 24.42 |
| 7 × 7 | 14/4 | 44.39 | (4.83) | 11.71 | (128.06) |  | 0.65 | (0.10) | 18.92 | 0.18 | 22.58 |
| 8/5 | 43.78 | (4.63) | 54.43 | (135.83) |  | 0.64 | (0.10) | 18.92 | 0.18 | 22.02 |
| 27/7 | 45.61 | (5.15) | -105.88 | (315.37) |  | 0.65 | (0.10) | 18.91 | 0.18 | 24.57 |
| MSAVI2 | 3 × 3 | 14/4 | 44.56 | (5.16) | 3.20 | (258.76) |  | 0.65 | (0.10) | 18.91 | 0.18 | 24.50 |
| 8/5 | 44.94 | (4.92) | -36.36 | (274.18) |  | 0.65 | (0.10) | 18.91 | 0.18 | 24.48 |
| 27/7 | 46.28 | (4.83) | -237.27 | (365.67) |  | 0.64 | (0.10) | 18.90 | 0.18 | 23.42 |
| 5 × 5 | 14/4 | 45.04 | (5.10) | -28.93 | (186.69) |  | 0.65 | (0.10) | 18.91 | 0.18 | 24.21 |
| 8/5 | 44.19 | (4.87) | 34.51 | (206.12) |  | 0.65 | (0.10) | 18.92 | 0.18 | 23.82 |
| 27/7 | 47.19 | (5.08) | -308.25 | (350.28) |  | 0.65 | (0.10) | 18.87 | 0.19 | 24.36 |
| 7 × 7 | 14/4 | 44.75 | (4.92) | -8.60 | (138.98) |  | 0.65 | (0.10) | 18.91 | 0.18 | 23.02 |
| 8/5 | 43.81 | (4.65) | 56.58 | (148.72) |  | 0.64 | (0.10) | 18.92 | 0.18 | 22.35 |
| 27/7 | 46.65 | (5.12) | -222.94 | (319.28) |  | 0.65 | (0.10) | 18.88 | 0.19 | 24.68 |

**Note:** ** = *p* < 0.01, * = *p* < 0.05, ᵻ = *p* < 0.1, NIR = Near Infrared; NDVI = Normalized Difference Vegetation Index; SAVI = Soil-Adjusted Vegetation Index; MSAVI2 = Modified Soil-Adjusted Vegetation Index; RMSE = Root mean square error; ΔAIC indicates the difference in the Akaike Information Criterion between the spatial and non-spatial forms of the regression model (AICnon-spatial - AICspatial), thus positive ΔAIC indicates model improvement over the non-spatial form.

© 2014 by the authors; licensee MDPI, Basel, Switzerland. This article is an open access article distributed under the terms and conditions of the Creative Commons Attribution license (http://creativecommons.org/licenses/by/3.0/).
